1 **Coagulation disorders in patients with severe hemophagocytic lymphohistiocytosis**

2

3 Sandrine Valade<sup>1</sup>, Bérandère S. Joly<sup>2</sup>, Agnès Veyradier<sup>2</sup>, Jehane Fadlallah<sup>3</sup>, Lara Zafrani<sup>1</sup>,  
4 Virginie Lemiale<sup>1</sup>, Amélie Launois<sup>2</sup>, Alain Stepanian<sup>2</sup>, Lionel Galicier<sup>3</sup>, Claire Fieschi<sup>3</sup>, Adrien  
5 Mirouse<sup>1</sup>, Jean Jacques Tudesq<sup>1</sup>, Anne-Claire Lepretre<sup>4</sup>, Elie Azoulay<sup>1</sup>, Michael Darmon<sup>1</sup>, Eric  
6 Mariotte<sup>1</sup>

7 <sup>1</sup>AP-HP, Hôpital Saint-Louis, Medical ICU, Paris, France; Université de Paris, Paris, France

8 <sup>2</sup> AP-HP, Hôpital Lariboisière, Hematology biology department, Paris, France; Université de  
9 Paris, Paris, France

10 <sup>3</sup> AP-HP, Hôpital Saint-Louis, Department of Clinical Immunology, Paris, France ; EA3518,  
11 Université de Paris, Paris, France

12 <sup>4</sup> Etablissement Français Du Sang, Hôpital Saint-Louis, Transfusion Department, Paris,  
13 France

14

15

16

17 **Corresponding author:**

18 Sandrine Valade, MD

19 AP-HP, Hôpital Saint-Louis, Medical ICU

20 1 avenue Claude Vellefaux, 75010 Paris, France

21 Tel: +33 142 499 420 Fax: +33 142 499 426

22 E-mail: [sandrine.valade@aphp.fr](mailto:sandrine.valade@aphp.fr)

23 **Abstract**

24 Background: Coagulation disorders are common in patients with hemophagocytic  
25 lymphohistiocytosis (HLH), associated with an increased risk of bleeding and death. We aim  
26 to investigate coagulation disorders and their outcome implications in critically ill patients  
27 with HLH.

28 Methods: We prospectively evaluated 47 critically ill patients with HLH (median age of 54  
29 years [42-67]) between April 2015 and December 2018. Coagulation assessments were  
30 performed at day 1. Abnormal standard coagulation was defined as prothrombin time (PT)  
31 <50% and/or fibrinogen <2g/L. HLH aetiology was mostly ascribed to haematological  
32 malignancies (74% of patients).

33 Results: Coagulation disorders and severe bleeding events were frequent, occurring in 30  
34 (64%) and 11 (23%) patients respectively. At day 1, median fibrinogen level was 2.65g/L  
35 [1.61-5.66]. Fibrinolytic activity was high as suggested by increased median levels of D-  
36 dimers, fibrin monomers, PAI-1 (plasminogen activator inhibitor) and tPA (tissue  
37 plasminogen activator). Forty-one (91%) patients had a decreased ADAMTS13 activity (A  
38 Disintegrin-like And Metalloproteinase with Thrombospondin type 1 repeats, member 13).  
39 By multivariable analysis, the occurrence of a severe bleeding (OR 3.215 [1.194-8.653],  
40  $p=0.021$ ) and SOFA score (Sepsis-Related Organ Failure Assessment) at day 1 (OR 1.305 per  
41 point [1.146-1.485],  $p<0.001$ ) were independently associated with hospital mortality. No early  
42 biological marker was associated with severe bleeding.

43 Conclusions: Hyperfibrinolysis may be the primary mechanism responsible for  
44 hypofibrinogenemia and may also participate in ADAMTS13 degradation. Targeting the  
45 plasmin system appears as a promising approach in severe HLH-related coagulation disorders.

46

## 47 **Introduction**

48 Hemophagocytic lymphohistiocytosis (HLH), or hemophagocytic syndrome, is a rare  
49 condition, represented by a severe systemic inflammatory state. The pathophysiology is most  
50 often supported by a deficient cytotoxicity in CD8 or NK lymphocytes resulting, after  
51 stimulation by a trigger, in an uncontrolled inflammatory response of macrophages [1–4]. This  
52 leads to high levels of circulating pro inflammatory cytokines, responsible for various  
53 biological abnormalities and clinical symptoms [5,6]. HLH can be very severe and intensive  
54 care unit (ICU) admission is often required due to organ failures [7]. Prognosis of critically ill  
55 patients with HLH remains grim with high mortality rates, ranging between 40% and 80% [8–  
56 10]. Survival is especially poor in patients with underlying hematological malignancies  
57 [8,9,11–13].

58 Coagulation disorders are described in more than half of patients with HLH [9,14,15].  
59 The most frequent reported abnormality is an isolated decrease in fibrinogen level [3,6,9,14–  
60 18] whose mechanisms remain incompletely understood. Hypofibrinogenemia could be the  
61 result of primary fibrinolysis and/or disseminated intravascular coagulation (DIC), but no study  
62 has specifically focused on haemostasis pathways in HLH so far. There is also no data regarding  
63 involvement of primary haemostasis in HLH. Von Willebrand factor (VWF) is a multimeric  
64 glycoprotein essential for both platelet adhesion and aggregation after vascular injury.  
65 ADAMTS13 (A Disintegrin-like And Metalloproteinase with ThromboSpondin type 1 repeats,  
66 member 13) prevents the formation of platelet-rich thrombi by cleaving VWF ultralarge and  
67 hyperadhesive multimers. A severe deficiency of ADAMTS13 activity leads to thrombotic  
68 thrombocytopenic purpura (TTP), a specific thrombotic microangiopathy (TMA) characterized  
69 by neurologic and cardiac involvement [19–21]. However, despite its key role in primary  
70 haemostasis and its potential link with plasmin activation [22] ADAMTS13 involvement in  
71 HLH pathophysiology has never been investigated.

72 Hypofibrinogenemia is associated both with an increased risk of bleeding and a high  
73 mortality rate in earlier HLH studies [14–17,23,24]. However, only few data are available in  
74 critically ill HLH patients presenting with coagulation disorders. The largest study focusing on  
75 these patients reported that a fibrinogen level < 2 g/L was the only biological feature correlated  
76 with the occurrence of a severe haemorrhage [14]. Coagulation impairment is associated with  
77 an increased risk of death in HLH patients, especially low fibrinogen levels appear to be highly  
78 correlated with case fatality in retrospective studies [14–16]. So far, however, no clear  
79 mechanism leading to hypofibrinogenemia has been identified.

80 The main objective of this study was to explore in depth coagulation disorders in  
81 patients with severe HLH and to assess whether they are associated with bleedings and  
82 mortality. We also sought to identify early biomarkers associated with the occurrence of a  
83 bleeding event.

84

## 85 **Materials and methods**

### 86 *Patients and blood collection*

87 This prospective study was conducted in Saint Louis hospital (Paris, France) between  
88 April 2015 and December 2018. The Institutional Review Board (IRB 00006477v) of  
89 HUPNVS, Paris 7 University, AP-HP has approved the project (number 15-008). In accordance  
90 with the French legislation, the database was declared to the CNIL (“Commission Nationale de  
91 l’Informatique et des Libertés”) (number 1837047v0). All adult patients diagnosed with HLH  
92 were included after informed consent. For specialized haemostasis investigation, venous blood  
93 was collected at day 1 into 1:10 final volume of 3.2% sodium citrate and double centrifuged  
94 (2500g for 10 minutes) to obtain platelet-poor plasma. Plasma samples were stored at -80°C  
95 until tested.

96 *Definitions*

97 HLH diagnosis was established according to the classification developed by the  
98 Histiocyte Society in 2004 (Table S1) and was confirmed jointly by attending haematologists  
99 and intensivists. The HScore was obtained from clinical and biological data on day 1 (Table  
100 S2). Aetiological diagnoses were made on a consensual basis, according to the results of  
101 diagnostic investigations. Based on a previous retrospective study from our group, coagulation  
102 disorders were defined by a prothrombin time (PT) < 50% and/or fibrinogen level < 2 g/L [14].  
103 A severe haemorrhage consisted of a bleeding event requiring either red blood cells transfusion  
104 or haemostatic procedure (surgery or embolization), corresponding to grades 3-4 of the  
105 Common Terminology Criteria for Adverse Events (CTCAE v5) [25]. Organ failures were  
106 defined according to the Sepsis-Related Organ Failure Assessment (SOFA) score which was  
107 measured at admission [26]. Acute respiratory failure was defined by tachypnoea > 30/min,  
108 respiratory distress, SpO<sub>2</sub> < 90% at ICU admission and/or laboured breathing [27]. Sepsis was  
109 established according to the 2001 task force definitions [28].

110

111 *Specialized haemostasis assays*

112 All haemostasis assays were performed on platelet-poor plasma, according to the  
113 manufacturers' instructions.

114 First, fibrinolysis parameters were investigated. D-dimers (N < 0.5 µg/mL) and fibrin  
115 monomers (N < 6 µg/mL) were measured by immuno-turbidimetry using the STA-Liatest D-Di  
116 Plus® and the STA-Liatest FM® reagents, respectively, on the STA-R automate (Stago,  
117 Asnières-sur-Seine, France). Plasminogen concentration was measured (N: 80-120%) using the  
118 chromogenic STA-Stachrom® Plasminogen assay (Stago, Asnières-sur-Seine, France). Tissue  
119 plasminogen activator (t-PA) (N: 2-12 ng/mL) and plasminogen activator inhibitor-1 (PAI-1)

120 (N: 4-43 ng/mL) were measured by ELISA using the Asserachrom tPA® and Asserachrom  
121 PAI-1® commercial kits, respectively (Stago, Asnières-sur-Seine, France).

122 Second, VWF and ADAMTS13 parameters were investigated. VWF antigen (Ag) (N: 50-150  
123 IU/dL) was measured using the automated STA-Liatest VWF:Ag® (Diagnostica Stago,  
124 Asnières-sur-Seine, France). ADAMTS13 activity (N: 50-150 IU/dL) was measured with in-  
125 house FRETs-VWF73 assay using the recombinant VWF73 peptide (Peptide Institute, Osaka,  
126 Japan), as previously described [29]. ADAMTS13:Ag (N: 0.630-0.850 µg/mL) was measured  
127 using the Imubind® ADAMTS13 ELISA (BioMedica Diagnostics, Stamford, Connecticut,  
128 USA). Anti-ADAMTS13 IgGs (positivity threshold: 15 U/mL) were screened and titrated using  
129 the TECHNOZYM® ADAMTS-13 INH ELISA (Technoclone, Vienna, Austria).

130

### 131 *Statistical analysis*

132 All quantitative variables were described using medians (quartiles) while qualitative  
133 variables were described by frequencies (percentage). Hospital mortality was the variable of  
134 primary interest. Correlations between biological and clinical characteristics were assessed  
135 using correlation matrix and correlation plots.

136 Independent predictors of mortality and severe bleeding were assessed using logistic  
137 regression models. Variables of interest were selected according to their relevance and  
138 statistical significance in univariate analysis. We used conditional forward stepwise regression  
139 with 0.2 as the critical P-value for entry into the model, and 0.1 as the P-value for removal.  
140 Interactions and correlations between the explanatory variables were carefully checked.  
141 Continuous variables for which log-linearity was not confirmed were transformed into  
142 categorical variables according to median or IQR. The final models were assessed by

143 calibration, discrimination and relevancy. Residuals were plotted, and the distributions  
144 inspected.

145 Survivals were plotted using Kaplan Meier curves and compared using log-rank tests.

146 To assess influence of outliers on influence of fibrinogen on risk of severe hemorrhage,  
147 we used a bootstrapping technique, resampling the original set 1000 times with replacement  
148 then assessing distribution of fibrinogen in patients with and without severe hemorrhage and  
149 distribution of Odd ratios in a logistic regression with severe hemorrhage as variable of interest.

150 All tests were two-sided, and P-values less than 0.05 were considered statistically  
151 significant. Analyses were done using R software version 3.4.4 (<https://www.r-project.org>),  
152 including corplot, survival, survminer and givitiR packages.

153

## 154 **Results**

155 Overall, 47 patients (38% female) were included, median age 54 years [42-67], of whom  
156 37 (79%) required ICU admission (Table 1). Critically ill patients were mainly admitted for  
157 acute respiratory distress (n = 14; 30%) or hemodynamic failure (n = 10; 21%). Almost two-  
158 thirds of patients (n = 29) were known immunocompromised at baseline (hematological  
159 malignancy, n = 13; HIV, n = 11; solid organ transplant, n = 2, other, n = 3). The patients  
160 fulfilled 5 [4-5] HLH 2004 criteria and median HScore was 244 [221-276]. Thirty nine (83%)  
161 of them presented with bicytopenia or pancytopenia and all except three had thrombocytopenia  
162 with a median platelet count of  $47 \times 10^9/L$  [26-66]. Fever was almost constant and histological-  
163 cytological hemophagocytosis was found in 68% of the patients, mostly in bone marrow  
164 aspirate (n = 29). After an exhaustive investigative work up, HLH etiology was ascribed to  
165 haematological malignancy in 35 patients (74%, chiefly B-cell (n = 17) or T-cell lymphoma (n

166 = 10)) (Table 1). Infectious disease was the HLH trigger in 7 patients (15%, represented by  
167 Mycobacteria- related infections in half of the cases), and auto-immune diseases triggered HLH  
168 in 2 patients. Three additional patients had an alternative diagnosis or an unknown etiology.



169 **Table 1.** Characteristics of patients with hemophagocytic lymphohistiocytosis according to  
170 the outcome

| <b>N (%) or Median [IQR]</b>    | <b>Survivors<br/>(n = 29)</b> | <b>Non survivors<br/>(n = 18)</b> | <b>p</b>         |
|---------------------------------|-------------------------------|-----------------------------------|------------------|
| <b>Demographics</b>             |                               |                                   |                  |
| Age                             | 50 [35-67]                    | 55.5 [45.5-67]                    | 0.34             |
| Female gender                   | 12 (41%)                      | 6 (33%)                           | 0.81             |
| <b>Comorbidities</b>            |                               |                                   |                  |
| HIV infection                   | 7 (24%)                       | 4 (22%)                           | 1                |
| Hypertension                    | 9 (31%)                       | 6 (33%)                           | 1                |
| Diabetes                        | 3 (10%)                       | 1 (6%)                            | 0.97             |
| <b>ICU admission</b>            | 20 (69%)                      | 17 (94%)                          | 0.09             |
| <b>Aetiological diagnosis</b>   |                               |                                   |                  |
| Onco-hematological malignancy   | 21 (72%)                      | 14 (78%)                          | 0.95             |
| - B cell lymphoma               | 11                            | 5                                 |                  |
| - T or NK cell lymphoma         | 6                             | 5                                 |                  |
| - Hodgkin lymphoma              | 3                             | 3                                 |                  |
| - Other                         | 1                             | 1                                 |                  |
| Infectious disease              | 5 (17%)                       | 2 (11%)                           | 0.88             |
| Auto-immune disease             | 2 (7%)                        | 0                                 | 0.69             |
| Unknown/alternative diagnosis   | 1 (3%)                        | 2 (11%)                           | 0.67             |
| <b>HLH criteria</b>             |                               |                                   |                  |
| Hepatomegaly                    | 15 (52%)                      | 13 (72%)                          | 0.28             |
| Splenomegaly                    | 19 (66%)                      | 12 (67%)                          | 1                |
| Ferritin level (µg/L)           | 11433 [5215-24474]            | 18790 [8980-40347]                | 0.19             |
| Triglycerides level (mmol/L)    | 3.1 [1.9-3.9]                 | 3.05 [2.1-3.9]                    | 0.77             |
| Leucocytes (mm <sup>3</sup> )   | 2730 [1820-4470]              | 6460 [1923-10268]                 | 0.29             |
| Hemoglobin (g/dL)               | 8 [7.2-8.8]                   | 8.9 [7.4-9.1]                     | 0.22             |
| Platelets (x10 <sup>9</sup> /L) | 47 [28-66]                    | 38 [17-57]                        | 0.14             |
| Histological hemophagocytosis   | 19 (66%)                      | 13 (72%)                          | 0.88             |
| HScore                          | 243 [219-269]                 | 249 [237-289]                     | 0.2              |
| <b>Hemostasis tests (day 1)</b> |                               |                                   |                  |
| Prothrombin time (%)            | 66 [55-80]                    | 51 [37-66]                        | <b>0.014</b>     |
| Fibrinogen (g/L)                | 2.93 [1.63-4.75]              | 2.41 [1.41-5.67]                  | 0.71             |
| ADAMTS13 activity (IU/dL)       | 25 [14-38]                    | 16 [11-28]                        | 0.14             |
| <b>SOFA score</b>               | 4 [3-7]                       | 8.5 [6-12]                        | <b>&lt;0.001</b> |
| <b>Severe hemorrhage</b>        | 2 (7%)                        | 9 (50%)                           | <b>0.002</b>     |
| <b>Treatments in the ICU</b>    |                               |                                   |                  |
| Mechanical ventilation          | 4 (14%)                       | 11 (61%)                          | <b>0.002</b>     |
| Vasopressors                    | 8 (28%)                       | 9 (50%)                           | 0.21             |
| Renal replacement therapy       | 0                             | 8 (44%)                           | <0.001           |
| <b>HLH-related treatments</b>   |                               |                                   |                  |
| Etoposide                       | 19 (66%)                      | 15 (83%)                          | 0.32             |
| Corticosteroids                 | 19 (66%)                      | 16 (89%)                          | 0.15             |
| <b>Transfusion (day 1)</b>      |                               |                                   |                  |
| FFP (mL)                        | 0                             | 412 [0-600]                       | <b>0.001</b>     |
| Platelets (units)               | 0 [0-6.2]                     | 7.4 [0-8]                         | <b>0.02</b>      |

171 HIV, human immunodeficiency virus; ICU, intensive care unit; SOFA, Sepsis-related Organ Failure Assessment;  
172 FFP, fresh frozen plasma

173 Thirty patients (64%) presented with coagulation disorders at day 1: median PT was  
174 64% [48-72], median fibrinogen level was 2.65 g/L [1.61-5.66]. Regarding fibrinolytic activity  
175 in 45 patients with plasma samples available at day 1, median D-dimers and fibrin monomers  
176 levels were highly increased at 6.25  $\mu\text{g/mL}$  [2.5-10] and 9  $\mu\text{g/mL}$  [5-31], respectively (Figure  
177 1). Although median plasminogen level was decreased at 57% [40-73], median levels of both  
178 tPA and PAI-1 were also increased at 45 ng/mL [31-67] and 94 ng/mL [45-188], respectively,  
179 (Figure 1). VWF antigen was highly elevated, mostly above the upper limit of quantification of  
180 the method ( $> 420$  IU/dL), in all patients except one. ADAMTS13 antigen levels were slightly  
181 decreased at a median level of 0.264  $\mu\text{g/mL}$  [0.149-0.371] (Figure 2). Interestingly, 41/45  
182 (91%) of patients had a decreased ADAMTS13 activity ( $<50$  IU/dL) and 20/45 patients (44%)  
183 had a severe functional deficiency in ADAMTS13 (activity  $<20$  IU/dL). ADAMTS13 activity  
184 (median: 22 IU/dL [12-33]) was well correlated with ADAMTS13 antigen levels (median:  
185 0.264  $\mu\text{g/mL}$  [0.15-0.4]) (Figure 2). None of the 45 patients showed detectable anti-  
186 ADAMTS13 IgGs.

187

#### 188 **Figure 1: Investigation for fibrinolysis-related parameters in 45 patients with HLH.**

189 Each patient is represented by an icon. (A) fibrinogen; (B) D-dimers; (C) fibrin monomers; (D)  
190 plasminogen; (E) t-PA ; (F) PAI-1.; normal ranges are represented as dashed lines; medians and  
191 IQR are represented as black lines.

192

#### 193 **Figure 2: Investigation for ADAMTS13 in 45 patients with HLH.**

194 (A) Each patient is represented by an icon; ADAMTS13 activity and ADAMTS13 antigen  
195 levels are represented in the same graph; the upper limit of normal ranges are represented as

196 red lines; medians and IQR are represented as black lines. (B) Correlation curve between  
197 ADAMTS13 activity and ADAMTS13 antigen.

198

199           Eleven (23%) patients experienced a bleeding event; all of them were admitted to the  
200 ICU (Table 2). The most frequent localizations of haemorrhage were digestive tractus (n = 3)  
201 and puncture sites (n = 3), followed by intracranial (n = 2) and surgery sites (n = 2).  
202 Haemorrhage occurred 3 days [1-7] after HLH diagnosis and 2 days [0-5.5] after ICU  
203 admission. Median fibrinogen level was 1.46 g/L [1.29-2.64] at the onset of haemorrhage. Six  
204 patients required haemostatic procedures, either surgery (n = 3), endoscopy (n = 2) or vascular  
205 embolization (n = 1). Red blood cells (RBC) transfusions were used in 39 patients (83%), 34  
206 patients (72%) received platelet transfusion and 19 (40%) received fresh frozen plasma (FFP).  
207 Five additional patients received fibrinogen concentrates. Median amount of transfused blood  
208 products was 3 RBC units [2-4], 27.2 platelets units [10-48.9] and 1650 mL of FFP [725-3300].

209 **Table 2.** Characteristics of patients with hemophagocytic lymphohistiocytosis according to  
 210 the occurrence of a severe hemorrhage

| <b>N (%) or Median [IQR]</b>    | <b>Non-bleeding patients (n = 36)</b> | <b>Bleeding patients (n = 11)</b> | <b>p</b>     |
|---------------------------------|---------------------------------------|-----------------------------------|--------------|
| <b>Demographics</b>             |                                       |                                   |              |
| Age                             | 52 [40-67]                            | 55.5 [45.5-69]                    | 0.39         |
| Female gender                   | 16 (44%)                              | 2 (18%)                           | 0.22         |
| <b>Comorbidities</b>            |                                       |                                   |              |
| HIV infection                   | 8 (22%)                               | 3 (27%)                           | 1            |
| Hypertension                    | 12 (33%)                              | 3 (27%)                           | 0.99         |
| Diabetes                        | 4 (11%)                               | 0                                 | 0.59         |
| <b>ICU admission</b>            | 26 (72%)                              | 11 (100%)                         | 0.12         |
| <b>Aetiological diagnosis</b>   |                                       |                                   |              |
| Onco-hematological malignancy   | 26 (72%)                              | 9 (82%)                           | 0.81         |
| - B cell lymphoma               | 11                                    | 5                                 |              |
| - T or NK cell lymphoma         | 7                                     | 4                                 |              |
| - Hodgkin lymphoma              | 6                                     | 0                                 |              |
| - Other                         | 2                                     | 0                                 |              |
| Infectious disease              | 6 (17%)                               | 1 (9%)                            | 0.89         |
| Auto-immune disease             | 2 (6%)                                | 0                                 | 1            |
| Unknown/alternative diagnosis   | 2 (6%)                                | 1 (9%)                            | 1            |
| <b>HLH criteria</b>             |                                       |                                   |              |
| Hepatomegaly                    | 22 (61%)                              | 6 (55%)                           | 0.97         |
| Splenomegaly                    | 24 (67%)                              | 7 (64%)                           | 1            |
| Ferritin level (µg/L)           | 10757 [5660-21092]                    | 32489 [12273-42317]               | 0.053        |
| Triglycerides level (mmol/L)    | 2.85 [1.87-3.78]                      | 3.6 [3.0-4.4]                     | 0.15         |
| Leucocytes (mm <sup>3</sup> )   | 2835 [1795-7773]                      | 8660 [2035-10125]                 | 0.33         |
| Hemoglobin (g/dL)               | 8.0 [7.2-8.8]                         | 9.1 [8.5-9.5]                     | 0.02         |
| Platelets (x10 <sup>9</sup> /L) | 47 [25-64]                            | 39 [24-56]                        | 0.56         |
| Histological hemophagocytosis   | 25 (69%)                              | 7 (64%)                           | 1.00         |
| HScore                          | 246 [220-272]                         | 244 [232-287]                     | 0.57         |
| <b>Hemostasis tests (day 1)</b> |                                       |                                   |              |
| Prothrombin time (%)            | 66 [53-79]                            | 48 [38-61]                        | <b>0.024</b> |
| Fibrinogen (g/L)                | 2.94 [1.69-5.6]                       | 1.57 [1.35-3.19]                  | 0.14         |
| ADAMTS13 activity (IU/dL)       | 20 [11-32]                            | 27 [19-33]                        | 0.309        |
| <b>SOFA score</b>               | 5 [3-9]                               | 8 [5.5-12]                        | <b>0.033</b> |
| <b>Treatments in the ICU</b>    |                                       |                                   |              |
| Mechanical ventilation          | 9 (25%)                               | 6 (55%)                           | 0.14         |
| Vasopressors                    | 10 (28%)                              | 7 (64%)                           | 0.07         |
| Renal replacement therapy       | 4 (11%)                               | 4 (36%)                           | 0.14         |
| <b>HLH-related treatments</b>   |                                       |                                   |              |
| Etoposide                       | 25 (69%)                              | 9 (82%)                           | 0.68         |
| Corticosteroids                 | 24 (67%)                              | 11 (100%)                         | 0.07         |
| <b>Transfusion (day 1)</b>      |                                       |                                   |              |
| FFP (mL)                        | 0                                     | 600 [0-1100]                      | <b>0.001</b> |
| Platelets (units)               | 0                                     | 5.8 [0-8]                         | 0.25         |
| <b>Hospital death</b>           | 9 (25%)                               | 9 (82%)                           | <b>0.003</b> |

211 HIV, human immunodeficiency virus; ICU, intensive care unit; SOFA, Sepsis-related Organ Failure Assessment;  
 212 FFP, fresh frozen plasma.

213 In the ICU, median SOFA score was 6 [3.5-9]. Fifteen patients (32%) required  
214 mechanical ventilation and 17 (36%) vasopressors. Eight patients underwent dialysis.  
215 Regarding HLH treatment, etoposide (VP16) was given to 72% of patients and corticosteroids  
216 to 74%. The majority of patients with haematological malignancies also received specific  
217 chemotherapy (n = 32, 91%).

218 Eighteen patients (38%) died during hospital stay. By univariate analysis, the  
219 occurrence of haemorrhage (p = 0.003), PT (p = 0.016), FFP transfusion (p = 0.002), platelets  
220 transfusion (p = 0.018), SOFA score (p < 0.001) and mechanical ventilation requirement (p =  
221 0.003) were associated with hospital mortality (Table 2). Patients who experienced a bleeding  
222 event had more severe organ dysfunctions (median SOFA score 8 [5-12] versus 5 [3-9], p =  
223 0.033; median lactate level 3.8 [3.6-8.2] versus 2.2 [1.4-3], p = 0.014), had a lower PT at day 1  
224 (48% [37.5-60.5] versus 65% [53-79], p = 0.024), and received more often FFP (600 mL [0-  
225 110] versus none, p = 0.001). No significant difference was found regarding fibrinogen level  
226 between decedents and survivors (1.57 g/L [1.35-3.19] versus 2.94 g/L [1.69-5.6], p = 0.14).  
227 Furthermore, we did not find any correlation across the different biological haemostasis  
228 parameters (Figure S1).

229 By multivariable analysis, the occurrence of a severe haemorrhage (OR 3.2 [1.2-8.6], p  
230 = 0.02) and SOFA score (OR 1.3 per point [1.1-4.5], p < 0.001) were associated with hospital  
231 mortality (Figure 3). No specific haemostasis parameter was associated with bleeding events.  
232 In a post hoc analysis we assessed influence of outliers on fibrinogen distribution using  
233 bootstrapping technique. In the vast majority of resampled sets, fibrinogen level was higher in  
234 patients without haemorrhage than with haemorrhage (3.6 g/L [95%CI 3.5-3.6] vs. 2.8 g/L  
235 [95%CI 2.6-3.1]; P<0.001) suggesting a strong influence of outlier on the absence of difference  
236 in our dataset (Figure S2).

237 **Figure 3: Survival curve according to the occurrence of a severe haemorrhage**

238

239 **Discussion**

240 To our knowledge, this is the first prospective study investigating haemostasis disorders,  
241 bleeding complications and assessing outcome in critically ill patients with HLH. Furthermore,  
242 we are able to propose pathophysiological hypotheses explaining the mechanisms of  
243 hypofibrinogenemia.

244 First, our results confirm that coagulation impairment is frequent during severe HLH,  
245 as almost two thirds of patients have PT < 50% and/or fibrinogen level < 2 g/L in this cohort.  
246 This is in line with previous studies in which up to 60% of patients presented haemostasis  
247 disorders [9,14–18]. The association between coagulation disorders and prognosis in HLH  
248 patients has been previously reported. Particularly, a low fibrinogen level seems to be  
249 associated with adverse outcome [14–16], although we were not able to demonstrate a strong  
250 impact of any specific haemostasis parameters on mortality rate in this study, FFP transfusions  
251 being a major confounding factor. The relationship between haemostasis disorders and  
252 prognosis remains unclear and may be linked to the occurrence of bleeding complications. Few  
253 studies have specifically focused on haemorrhages in small series of HLH patients [14,17,24].  
254 In our study, 23% of patients experienced a bleeding event, which strengthens the results of our  
255 previous retrospective study in which bleeding complications occurred in one fifth patients [14].  
256 Timing of haemorrhage is early, arising three days after HLH diagnosis. Moreover, we  
257 demonstrated that the occurrence of haemorrhage was strongly associated with mortality: 82%  
258 of patients who experienced a bleeding complication died, compared to 26% of those who did  
259 not. We also confirmed the association between coagulation disorders and the occurrence of  
260 bleeding events, even if PT value was the only haemostasis parameter significantly associated

261 with haemorrhage in this study. Fibrinogen level was decreased in bleeding patients (median  
262 1.57 g/L) without reaching the threshold of significance. In the literature, several studies support  
263 that fibrinogen level is associated with the occurrence of severe haemorrhages in HLH patients,  
264 with various cut-off values between 1.5 and 2 g/L.

265 This last point highlights the need to explore the mechanisms leading to  
266 hypofibrinogenemia in HLH process. We have here investigated for the first time the  
267 haemostasis pathway in critically ill HLH patients and we have obtained some arguments  
268 supporting that hypofibrinogenemia may be mostly related to primary hyperfibrinolysis and not  
269 DIC. First, we found that PAI-1 and tPA levels were elevated in our patients, suggesting  
270 increased levels of plasmin, the predominant enzyme responsible for fibrinolysis. This could be  
271 in line with in vitro studies that have shown activated macrophages can release plasminogen  
272 activator [30]. Recently, data obtained from a murine model of fulminant HLH [31] showed an  
273 increase in tPA and plasmin-antiplasmin complex levels, indicating that the fibrinolytic system  
274 was over-activated during HLH. More interestingly, plasmin inhibition leads to a decrease in  
275 fibrinogen degradation products levels, attenuates pro-inflammatory cytokines production,  
276 reduces macrophages recruitment and improves survival in HLH-mice [31]. Plasmin appears to  
277 have a key role in HLH process, not only by generating haemostasis disorders through a  
278 decrease in fibrinogen level, but as a major actor of the inflammatory response. This is also  
279 supported by our previous retrospective study [14] showing that HLH patients with coagulation  
280 disorders had a more intense hemophagocytic activity with higher ferritin levels, more frequent  
281 features of hemophagocytosis on bone marrow examination and also presented with more organ  
282 failures. Further specific studies are warranted in order to specify plasmin involvement in HLH-  
283 related coagulation disorders, and to define whether plasmin could be a potential therapeutic  
284 target in HLH.

285

286 We also interestingly demonstrated that more than 40% of patients had ADAMTS13  
287 activity < 20 IU/dL, without any associated clinical or biological features of TMA. To our  
288 knowledge, no previous study has ever explored ADAMTS13 involvement in HLH. During  
289 sepsis and trauma, several authors have reported a reduction of ADAMTS13 activity in plasma  
290 and its association with disease severity and outcome [32,33]. In a prospective study including  
291 72 patients with septic shock, Peigne *et al* demonstrated that half patients had decreased  
292 ADAMTS13 activity < 30 IU/dL. This partial ADAMTS13 functional deficiency was likely  
293 related to an inhibition of its catalytic site by high levels of IL-6 rather than any degradation by  
294 DIC-related enzymes, as ADAMTS13 activity and ADAMTS13 antigen levels were not  
295 correlated [34]. Contrary to Peigne *et al*, we found a very good correlation between  
296 ADAMTS13 activity and ADAMTS13 antigen, which supports a quantitative defect in relation  
297 with protein degradation or synthesis deficiency, rather than an immune antibodies- or an  
298 inflammatory cytokines-mediated mechanism. Additional hypotheses can be suggested to  
299 explain ADAMTS13 quantitative deficiency. Firstly, ADAMTS13 may be consumed by the  
300 very high levels of its substrate VWF released from the inflammatory activated endothelial  
301 cells. Secondly, the macrophage haemoglobin scavenger receptor CD163, whose expression is  
302 restricted to the monocyte-macrophage lineage, has been found as a potential marker of HLH  
303 in humans [35,36]. Its expression is correlated with enhanced phagocytic activity [37] and its  
304 extracellular part is cleaved upon macrophages activation, leading in high soluble CD163 levels  
305 in HLH patients. More recently, Verbij *et al* demonstrated *in vitro* that ADAMTS13 undergoes  
306 endocytosis by CD163-expressing macrophages [38]. This mechanism could explain the  
307 decrease in ADAMTS13 in HLH, taking into account the intense macrophages activation.  
308 Thirdly, several *in vitro* data suggest that ADAMTS13 activity could be impaired after  
309 undergoing proteolytic inactivation by plasmin and thrombin [39,40]. Indeed, Crawley *et al*  
310 demonstrated that ADAMTS13 was rapidly cleaved by exogenous plasmin at low



311 concentrations. This proteolytic inactivation results in the loss of ADAMTS13 activity. In HLH,  
312 as we previously demonstrated that our data support fibrinolytic pathway activation, we can  
313 therefore suppose that ADAMTS13 may be inactivated during hyperfibrinolytic state through  
314 high levels of circulating plasmin. This reinforces the fact that one of the main mechanisms  
315 responsible of haemostasis disorders in HLH could be in relation with primary  
316 hyperfibrinolysis.

317         However this study has some limitations. First, the small number of patients certainly  
318 has underpowered the analysis, especially regarding the impact of fibrinogen level which is  
319 supported by the bootstrap analysis. However HLH remains infrequent and few prospective  
320 studies have been conducted in the ICU. Second, due to its single-center design and our hospital  
321 specificity, a majority of patients with hematological malignancies have been included, even  
322 though haemostasis disorders have also been described in HLH patients with infectious or  
323 autoimmune triggers. Third, fourteen patients (30%) have received FFP transfusion at day 1,  
324 which could have overestimated ADAMTS13 and fibrinogen levels. Then, only preliminary  
325 data at day 1 have been analyzed; a future analysis including all haemostasis parameters during  
326 the first week monitoring is expected.

327

## 328 **Conclusions**

329         This study is the first prospective one specifically focusing on coagulation impairment in  
330 severe HLH patients. Haemostasis disorders are common in critically ill patients with HLH and  
331 are responsible of severe haemorrhages. Bleeding complications occur in nearly 25% of patients  
332 with an early timing and are associated with a high mortality rate. Several data suggest that  
333 hypofibrinogenemia may be the result of hyperfibrinolysis. This hypothesis is also supported  
334 by a decrease in ADAMTS13 activity, in the absence of TTP features, which is a new emerging

335 concept. Further investigation of haemostasis parameters is warranted to clarify the role of  
336 plasmin, in order to identify new potential therapeutic targets in HLH.

337

338 **Acknowledgments**

339 The authors would like to thank Sandrine Benghezal, Sylvaine Savigny and Sophie Capdenat  
340 for expert technical assistance. The authors thank Dr Issa Kalidi for the collection of plasma  
341 samples.

342 **References**

343

- 344 1. Valade S, Mariotte E, Azoulay E. Coagulation Disorders in Hemophagocytic  
345 Lymphohistiocytosis/Macrophage Activation Syndrome. *Crit Care Clin.* 2020;36:415–26.
- 346 2. Filipovich AH, Chandrakasan S. Pathogenesis of Hemophagocytic Lymphohistiocytosis.  
347 *Hematol Oncol Clin North Am.* 2015;29:895–902.
- 348 3. Janka GE. Hemophagocytic syndromes. *Blood Rev.* 2007;21:245–53.
- 349 4. Fujiwara F, Hibi S, Imashuku S. Hypercytokinemia in hemophagocytic syndrome. *Am J*  
350 *Pediatr Hematol Oncol.* 1993;15:92–8.
- 351 5. Yang S-L, Xu X-J, Tang Y-M, Song H, Xu W-Q, Zhao F-Y, et al. Associations between  
352 inflammatory cytokines and organ damage in pediatric patients with hemophagocytic  
353 lymphohistiocytosis. *Cytokine.* 2016;85:14–7.
- 354 6. Créput C, Galicier L, Buyse S, Azoulay E. Understanding organ dysfunction in  
355 hemophagocytic lymphohistiocytosis. *Intensive Care Med.* 2008;34:1177–87.
- 356 7. Lemiale V, Valade S, Calvet L, Mariotte E. Management of Hemophagocytic Lympho-  
357 Histiocytosis in Critically Ill Patients. *J Intensive Care Med.* 2018;35:118–127.
- 358 8. Buyse S, Teixeira L, Galicier L, Mariotte E, Lemiale V, Seguin A. Critical care  
359 management of patients with hemophagocytic lymphohistiocytosis. *Intensive Care Med.*  
360 2010.
- 361 9. Ramos-Casals M, Brito-Zerón P, López-Guillermo A, Khamashta MA, Bosch X. Adult  
362 haemophagocytic syndrome. *Lancet.* 2014;26:1503–16.
- 363 10. Rajagopala S, Singh N, Agarwal R, Gupta D, Das R. Severe hemophagocytic  
364 lymphohistiocytosis in adults-experience from an intensive care unit from North India. *Indian*  
365 *J Crit Care Med Peer-Rev Off Publ Indian Soc Crit Care Med.* 2012.
- 366 11. Otrrock ZK, Eby CS. Clinical characteristics, prognostic factors, and outcomes of adult  
367 patients with hemophagocytic lymphohistiocytosis. *Am J Hematol.* 2015;90:220–4.
- 368 12. Arca M, Fardet L, Galicier L, Rivière S, Marzac C, Aumont C. Prognostic factors of early  
369 death in a cohort of 162 adult haemophagocytic syndrome: impact of triggering disease and  
370 early treatment with etoposide. *Br J Haematol.* 2015;168:63–8.
- 371 13. Parikh SA, Kapoor P, Letendre L, Kumar S, Wolanskyj AP. Prognostic factors and  
372 outcomes of adults with hemophagocytic lymphohistiocytosis. *Mayo Clin Proc.* 2014;89:484–  
373 92.
- 374 14. Valade S, Azoulay E, Galicier L, Boutboul D, Zafrani L, Stepanian A, et al. Coagulation  
375 Disorders and Bleedings in Critically Ill Patients With Hemophagocytic Lymphohistiocytosis.  
376 *Medicine (Baltimore).* 2015;94:e1692.

- 377 15. Li F, Yang Y, Jin F, Dehoedt C, Rao J, Zhou Y, et al. Clinical characteristics and  
378 prognostic factors of adult hemophagocytic syndrome patients: a retrospective study of  
379 increasing awareness of a disease from a single-center in China. *Orphanet J Rare Dis.*  
380 2015;10:20.
- 381 16. Park H-S, Kim D-Y, Lee J-H, Lee J-H, Kim S-D, Park Y-H. Clinical features of adult  
382 patients with secondary hemophagocytic lymphohistiocytosis from causes other than  
383 lymphoma: an analysis of treatment outcome and prognostic factors. *Ann Hematol.*  
384 2012;91:897–904.
- 385 17. Li J, Wang Q, Zheng W, Ma J, Zhang W, Wang W, et al. Hemophagocytic  
386 lymphohistiocytosis: clinical analysis of 103 adult patients. *Medicine (Baltimore).*  
387 2014;93:100–5.
- 388 18. Wang Y-R, Qiu Y-N, Bai Y, Wang X-F. A retrospective analysis of 56 children with  
389 hemophagocytic lymphohistiocytosis. *J Blood Med.* 2016;7:227–31.
- 390 19. Furlan M, Robles R, Galbusera M, Remuzzi G, Kyrle PA, Brenner B, et al. von  
391 Willebrand factor-cleaving protease in thrombotic thrombocytopenic purpura and the  
392 hemolytic-uremic syndrome. *N Engl J Med.* 1998;339:1578–84.
- 393 20. Joly BS, Coppo P, Veyradier A. Thrombotic thrombocytopenic purpura. *Blood.*  
394 2017;129:2836–46.
- 395 21. Coppo P, Bengoufa D, Veyradier A, Wolf M, Bussel A, Millot GA, et al. Severe  
396 ADAMTS13 deficiency in adult idiopathic thrombotic microangiopathies defines a subset of  
397 patients characterized by various autoimmune manifestations, lower platelet count, and mild  
398 renal involvement. *Medicine (Baltimore).* 2004;83:233–44.
- 399 22. Tersteeg C, Joly BS, Gils A, Lijnen R, Deckmyn H, Declerck PJ, et al. Amplified  
400 endogenous plasmin activity resolves acute thrombotic thrombocytopenic purpura in mice. *J*  
401 *Thromb Haemost JTH.* 2017;15:2432–42.
- 402 23. Han A-R, Lee HR, Park B-B, Hwang IG, Park S, Lee SC. Lymphoma-associated  
403 hemophagocytic syndrome: clinical features and treatment outcome. *Ann;* 2007.
- 404 24. Kapoor S, Morgan CK, Siddique MA, Guntupalli KK. Intensive care unit complications  
405 and outcomes of adult patients with hemophagocytic lymphohistiocytosis: A retrospective  
406 study of 16 cases. *World J Crit Care Med.* 2018;7:73–83.
- 407 25. Basch E, Reeve BB, Mitchell SA, Clauser SB, Minasian LM, Dueck AC, et al.  
408 Development of the National Cancer Institute’s patient-reported outcomes version of the  
409 common terminology criteria for adverse events (PRO-CTCAE). *J Natl Cancer Inst.*  
410 2014;106.
- 411 26. Vincent JL, Moreno R, Takala J, Willatts S, De Mendonça A, Bruining H, et al. The  
412 SOFA (Sepsis-related Organ Failure Assessment) score to describe organ dysfunction/failure.  
413 On behalf of the Working Group on Sepsis-Related Problems of the European Society of  
414 Intensive Care Medicine. *Intensive Care Med.* 1996;22:707–10.
- 415 27. Azoulay E, Lemiale V, Mokart D, Nseir S, Argaud L, Pène F, et al. Effect of High-Flow  
416 Nasal Oxygen vs Standard Oxygen on 28-Day Mortality in Immunocompromised Patients

- 417 With Acute Respiratory Failure: The HIGH Randomized Clinical Trial. *JAMA*.  
418 2018;320:2099–107.
- 419 28. Levy MM, Fink MP, Marshall JC, Abraham E, Angus D, Cook D, et al. 2001  
420 SCCM/ESICM/ACCP/ATS/SIS International Sepsis Definitions Conference. *Intensive Care*  
421 *Med*. 2003;29:530–8.
- 422 29. Mariotte E, Azoulay E, Galicier L, Rondeau E, Zouiti F, Boisseau P, et al. Epidemiology  
423 and pathophysiology of adulthood-onset thrombotic microangiopathy with severe  
424 ADAMTS13 deficiency (thrombotic thrombocytopenic purpura): a cross-sectional analysis of  
425 the French national registry for thrombotic microangiopathy. *Lancet Haematol*. 2016;3:e237-  
426 245.
- 427 30. Unkeless JC, Gordon S, Reich E. Secretion of plasminogen activator by stimulated  
428 macrophages. *J Exp Med*. 1974;139:834–50.
- 429 31. Shimazu H, Munakata S, Tashiro Y, Salama Y, Dhahri D, Eiamboonsert S, et al.  
430 Pharmacological targeting of plasmin prevents lethality in a murine model of macrophage  
431 activation syndrome. *Blood*. 2017;130:59–72.
- 432 32. Lin J-J, Chan O-W, Hsiao H-J, Wang Y, Hsia S-H, Chiu C-H. Decreased ADAMTS 13  
433 Activity is Associated With Disease Severity and Outcome in Pediatric Severe Sepsis.  
434 *Medicine (Baltimore)* [Internet]. 2016 Apr;95(16):e3374
- 435 33. Russell RT, McDaniel JK, Cao W, Shroyer M, Wagener BM, Zheng XL, et al. Low  
436 Plasma ADAMTS13 Activity Is Associated with Coagulopathy, Endothelial Cell Damage and  
437 Mortality after Severe Paediatric Trauma. *Thromb Haemost*. 2018;118:676–87.
- 438 34. Peigne V, Azoulay E, Coquet I, Mariotte E, Darmon M, Legendre P, et al. The prognostic  
439 value of ADAMTS13 (a disintegrin and metalloprotease with thrombospondin type 1 repeats,  
440 member 13) deficiency in septic shock patients involves interleukin-6 and is not dependent on  
441 disseminated intravascular coagulation. *Crit Care Lond Engl*. 2013;17:R273.
- 442 35. Schaer DJ, Schleiffenbaum B, Kurrer M, Imhof A, Bächli E, Fehr J, et al. Soluble  
443 hemoglobin-haptoglobin scavenger receptor CD163 as a lineage-specific marker in the  
444 reactive hemophagocytic syndrome. *Eur J Haematol*. 2005;74:6–10.
- 445 36. Sakumura N, Shimizu M, Mizuta M, Inoue N, Nakagishi Y, Yachie A. Soluble CD163, a  
446 unique biomarker to evaluate the disease activity, exhibits macrophage activation in systemic  
447 juvenile idiopathic arthritis. *Cytokine*. 2018;110:459–65.
- 448 37. Møller HJ, Aerts H, Grønbaek H, Peterslund NA, Hyltoft Petersen P, Hornung N, et al.  
449 Soluble CD163: a marker molecule for monocyte/macrophage activity in disease. *Scand J*  
450 *Clin Lab Investig Suppl*. 2002;237:29–33.
- 451 38. Verbij FC, Sorvillo N, Kaijen PHP, Hrdinova J, Peyron I, Fijnheer R, et al. The class I  
452 scavenger receptor CD163 promotes internalization of ADAMTS13 by macrophages. *Blood*  
453 *Adv*. 2017;1:293–305.
- 454 39. Crawley JTB, Lam JK, Rance JB, Mollica LR, O'Donnell JS, Lane DA. Proteolytic  
455 inactivation of ADAMTS13 by thrombin and plasmin. *Blood*. 2005;105:1085–93.

456 40. Shin Y, Miyake H, Togashi K, Hiratsuka R, Endou-Ohnishi K, Imamura Y. Proteolytic  
457 inactivation of ADAMTS13 by plasmin in human plasma: risk of thrombotic  
458 thrombocytopenic purpura. *J Biochem (Tokyo)*. 2018;163:381–9.

459

460

461

462

463

464

465

466

467

468

469

470

471

472

473

474

475

476

477

478

479

480 **Supporting information captions**

481

482 **Table S1: HLH 2004 criteria (adapted from Henter et al, *Pediatr Blood Cancer* 2007)**

483

484 **Table S2: HScore (adapted from Fardet et al, *Arthritis Rheumatol* 2014)**

485

486 **Figure S1: matrix of correlation between biological hemostasis parameters**

487

488 **Figure S2: fibrinogen distribution after bootstrapping**

489

490

491

492



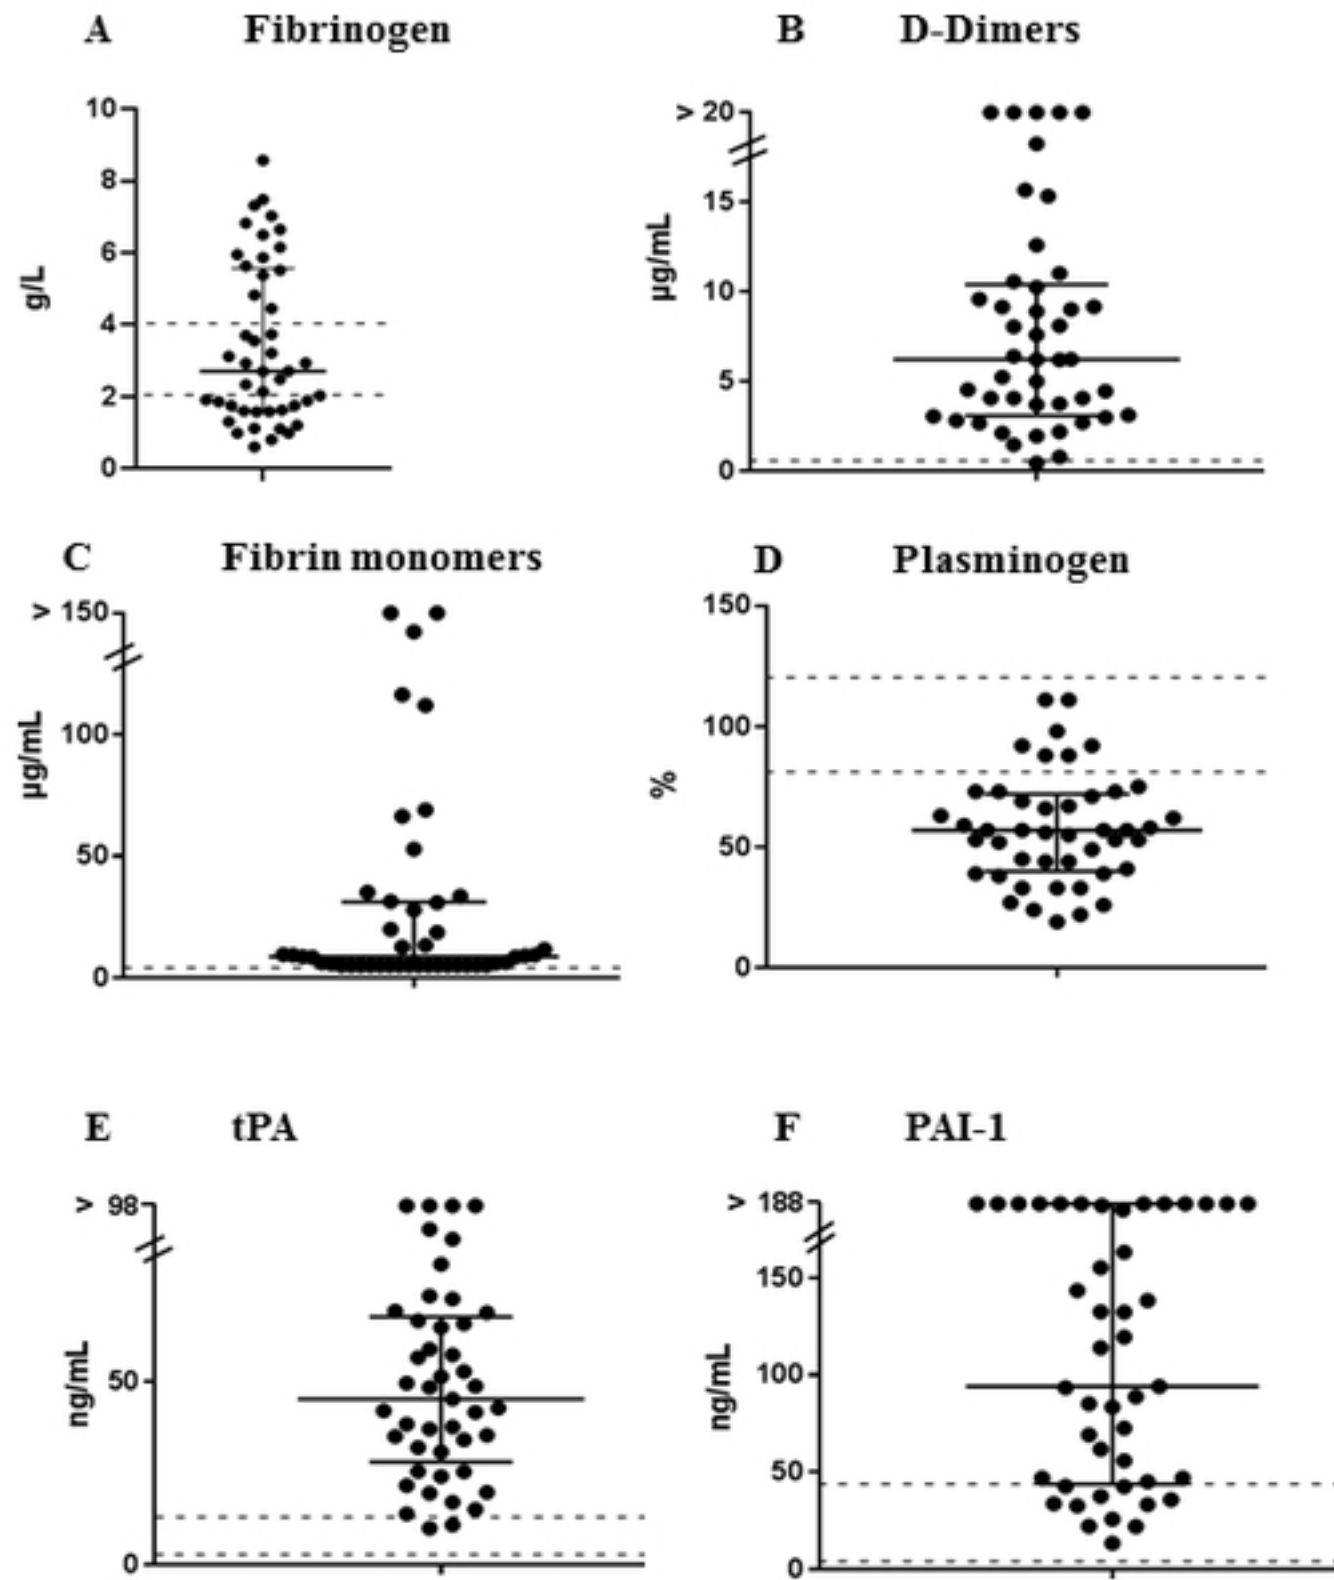

Figure

Figure 2A

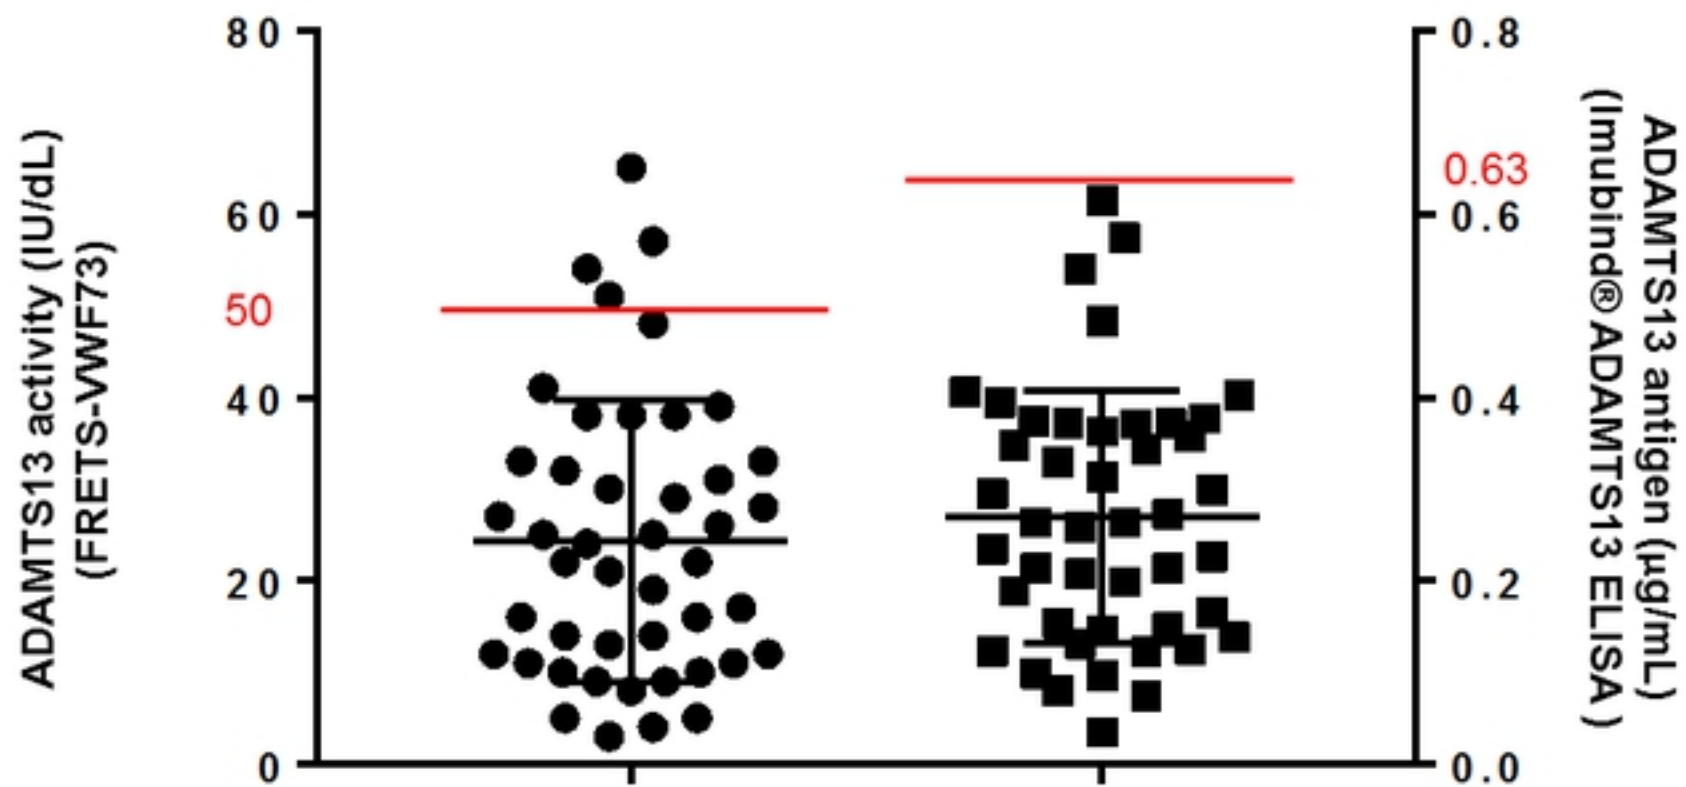

Figure 2B

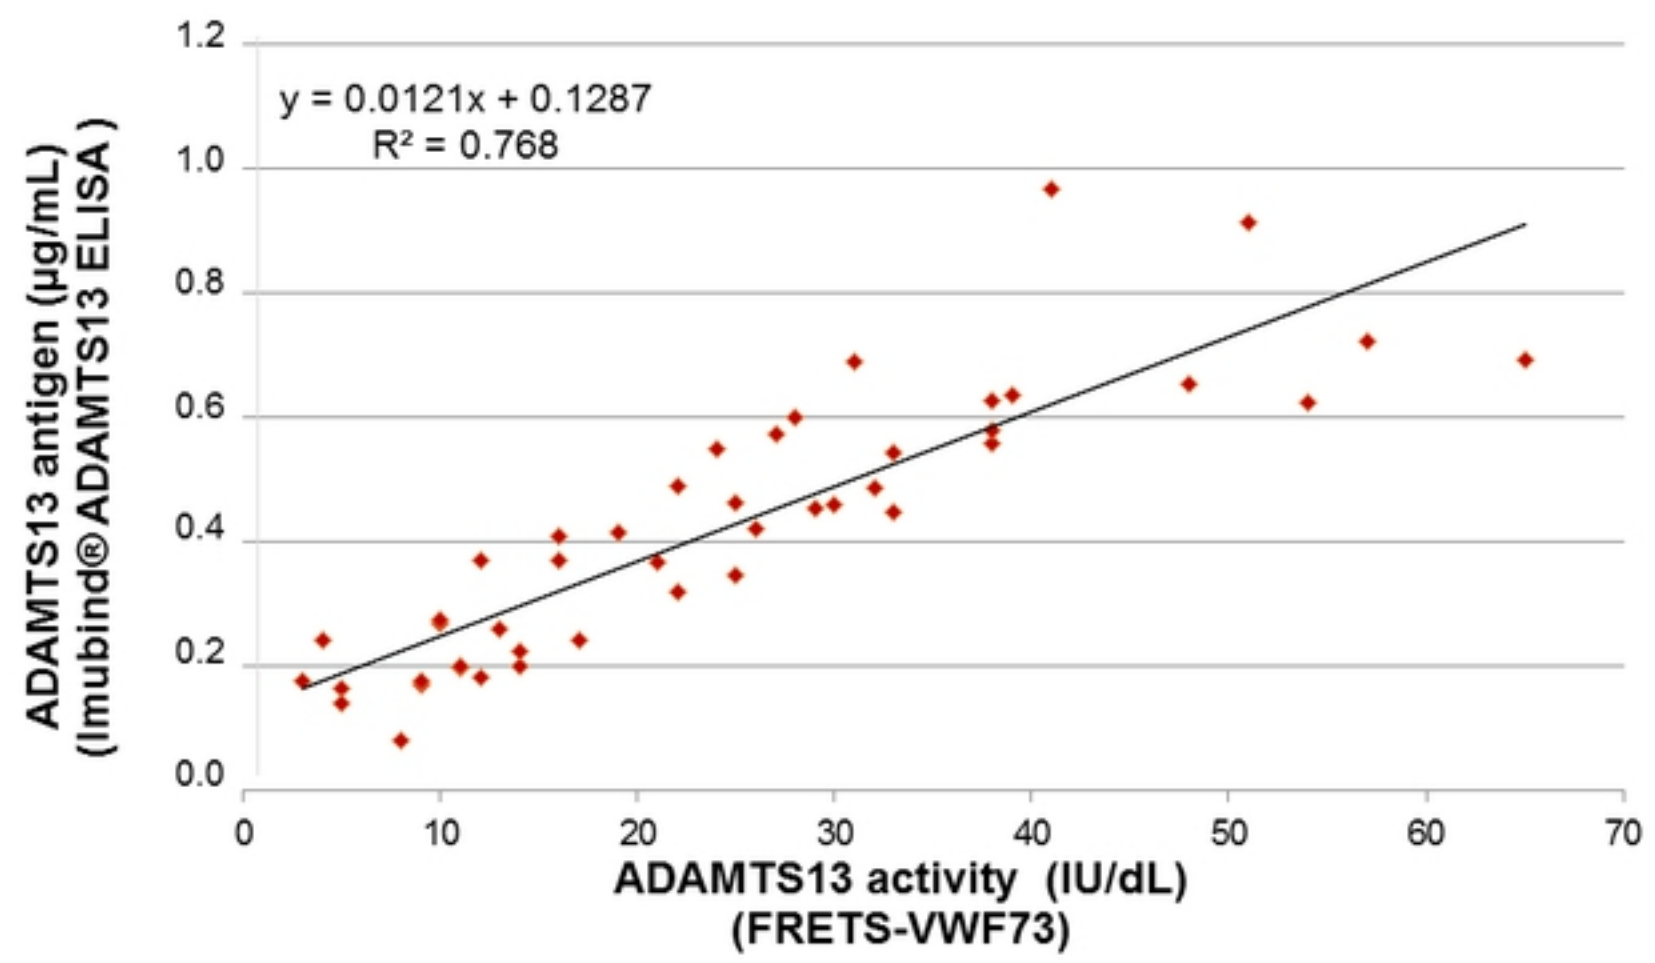

Figure

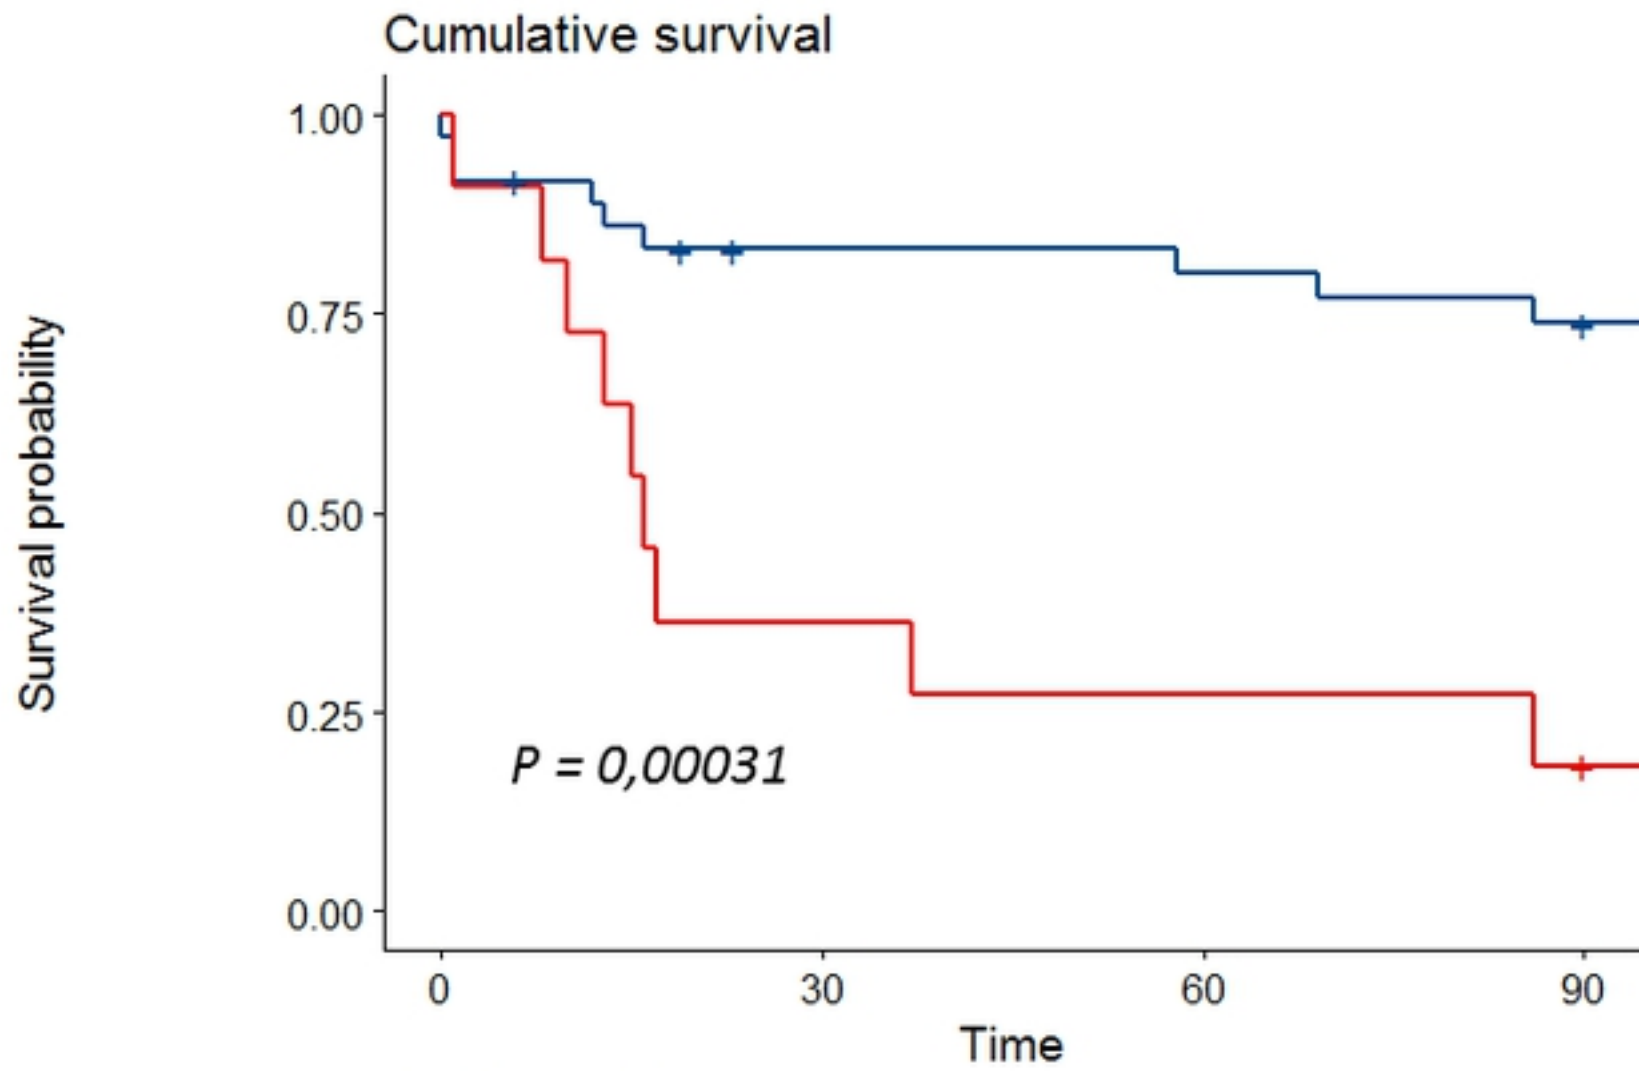

Number at risk

|               | 0  | 30 | 60 | 90 |
|---------------|----|----|----|----|
| HemorSevere=0 | 36 | 27 | 26 | 24 |
| HemorSevere=1 | 11 | 4  | 3  | 2  |

Figure
